# Supplementary material
Source: PubMed Central journal article supplement (PMC5559123)
Supplement: JCOPDF-3-419-s001.pdf [file JCOPDF-3-419-s001.pdf]

**e-Table 1. Methodological Quality of Included Studies**

| Study                  | Adequate Sequence generation | Allocation Concealment | Blinding     | Jadad Score |
|------------------------|------------------------------|------------------------|--------------|-------------|
| Soffler 1985           | Unclear                      | Unclear                | No-high risk | 2           |
| Carter 1986            | Unclear                      | Unclear                | No-high risk | 2           |
| Bower 1988             | Unclear                      | Unclear                | No-high risk | 2           |
| Braun 1992             | Unclear                      | Unclear                | No-high risk | 2           |
| McDonald 1995          | Unclear                      | Unclear                | Yes-low risk | 4           |
| Roberts 1996           | Yes-low risk                 | Yes-low risk           | No-high risk | 3           |
| Rooyackers 1997        | Yes-low risk                 | Yes-low risk           | Unclear      | 2           |
| Tiep 1997              | No-high risk                 | No-high risk           | No-high risk | 1           |
| Cuvelier 2002          | Unclear                      | Unclear                | No-high risk | 2           |
| Eaton 2002             | Unclear                      | Unclear                | Yes-low risk | 4           |
| Tiep 2002              | No-high risk                 | No-high risk           | No-high risk | 1           |
| Emtner 2003            | Yes-low risk                 | Unclear                | Yes-low risk | 5           |
| Chatila 2004           | No-high risk                 | No-high risk           | No-high risk | 1           |
| Fuhrman 2004           | Unclear                      | Unclear                | No-high risk | 2           |
| Nonoyama 2007          | Unclear                      | Unclear                | Yes-low risk | 4           |
| Janaudis-Ferreira 2009 | Yes-low risk                 | Unclear                | Unclear      | 3           |
| Strickland 2009        | Unclear                      | Unclear                | No-high risk | 2           |
| Palwai 2010            | Unclear                      | Unclear                | Yes-low risk | 4           |
| Moore 2011             | Yes-low risk                 | Yes-low risk           | Yes-low risk | 5           |
| Casaburi 2012          | Yes-low risk                 | Yes-low risk           | No-high risk | 3           |
| Dyer 2012              | Yes-low risk                 | Yes-low risk           | No-high risk | 3           |
| Marti 2013             | Yes-low risk                 | Yes-low risk           | Unclear      | 2           |
| Ringbaek 2013          | Yes-low risk                 | Yes-low risk           | Unclear      | 3           |

## Supplementary Method 1

### Search Strategy –Clinical and Device Efficacy

- chronic obstructive pulmonary disease/
- copd.mp.
- smoking-related lung disease\$.mp.
- lung emphysema/
- exp bronchitis/
- (chronic respiratory adj (disease or disorder)).mp. [mp=title, abstract, subject headings, heading word, drug trade name, original title, device manufacturer, drug manufacturer, device trade name, keyword]
- (chronic obstructive lung adj (disease or disorder)).mp. [mp=title, abstract, subject headings, heading word, drug trade name, original title, device manufacturer, drug manufacturer, device trade name, keyword]
- (chronic obstructive pulmonary adj (disease or disorder)).mp. [mp=title, abstract, subject headings, heading word, drug trade name, original title, device manufacturer, drug manufacturer, device trade name, keyword]
- (chronic obstructive airway adj (disease or disorder)).mp. [mp=title, abstract, subject headings, heading word, drug trade name, original title, device manufacturer, drug manufacturer, device trade name, keyword]
- (chronic obstructive respiratory adj (disease or disorder)).mp. [mp=title, abstract, subject headings, heading word, drug trade name, original title, device manufacturer, drug manufacturer, device trade name, keyword]
- chronic ventilatory failure.mp.
- 1 or 2 or 3 or 4 or 5 or 6 or 7 or 8 or 9 or 10 or 11
- oxygen therapy/
- exp ambulatory care/
- 13 and 14
- ((ambulat\$ or portable or supplemental or O2) adj2 (oxygen or therap\$)).mp. [mp=title, abstract, subject headings, heading word, drug trade name, original title, device manufacturer, drug manufacturer, device trade name, keyword]
- 15 or 16
- 12 and 17

## Supplementary Method 2

### Search Strategy –Cost effectiveness

- chronic obstructive lung disease/ (67861)
- copd.mp. (37001)
- smoking-related lung disease\$.mp. (97)
- lung emphysema/ (14765)
- exp bronchitis/ (45660)
- (chronic respiratory adj (disease or disorder)).mp. [mp=title, abstract, subject headings, heading word, drug trade name, original title, device manufacturer, drug manufacturer, device trade name, keyword] (1569)
- (chronic obstructive pulmonary adj (disease or disorder)).mp. [mp=title, abstract, subject headings, heading word, drug trade name, original title, device manufacturer, drug manufacturer, device trade name, keyword] (34872)
- (chronic obstructive lung adj (disease or disorder)).mp. [mp=title, abstract, subject headings, heading word, drug trade name, original title, device manufacturer, drug manufacturer, device trade name, keyword] (68620)
- (chronic obstructive airway adj (disease or disorder)).mp. [mp=title, abstract, subject headings, heading word, drug trade name, original title, device manufacturer, drug manufacturer, device trade name, keyword] (337)
- (chronic obstructive respiratory adj (disease or disorder)).mp. [mp=title, abstract, subject headings, heading word, drug trade name, original title, device manufacturer, drug manufacturer, device trade name, keyword] (106)
- chronic ventilatory failure.mp. (92)
- or/1-11 (130339)
- oxygen therapy/ (19975)
- exp ambulatory care/ (38150)
- 13 and 14 (123)
- ((ambulat\$ or portable or supplemental or O2) adj2 (oxygen or therap\$)).mp. (9268)
- 15 or 16 (9324)
- 12 and 17 (932)
- cost benefit analysis/ (65629)
- cost effectiveness analysis/ (90660)
